# Supplementary material for: In situ construction of one-dimensional porous MnO@C nanorods for electrode materials
Source: Royal Society of Chemistry journal article supplement (doi:10.1039/d0nj05653g), 2021-01-01
Supplement: d0nj05653g1.pdf [file d0nj05653g1.pdf]

**New Journal of Chemistry**

***In-situ* Construction of One-Dimensional Porous MnO@C Nanorods for  
electrode materials**

Jing Lin,<sup>a</sup> Lei Yu,<sup>b\*</sup> Wanqiang Liu,<sup>c</sup> Huaze Dong,<sup>a</sup> Xiongzi Dong,<sup>a</sup> Ming Zhao,<sup>a</sup> Yuanyuan Zhai,<sup>a</sup>  
Ji Xiang<sup>a</sup>, Mengyue Chen<sup>a</sup>

<sup>a</sup> Department of Chemical and Chemical Engineering, Hefei Normal University, Hefei 230601,  
Anhui, China.

<sup>b</sup> Anhui Institute of Optics and Fine Mechanics, Chinese Academy of Sciences, Hefei 230031,  
Anhui, China.

<sup>c</sup> School of Materials Science and Engineering, Changchun University of Science and  
Technology, Changchun 130022, China.

\* Corresponding author: Anhui Institute of Optics and Fine Mechanics, Chinese Academy of  
Sciences, Hefei 230031, Anhui, China.

*E-mail addresses:* [yulei@aiofm.ac.cn](mailto:yulei@aiofm.ac.cn) (L. Yu).

*Phone/Fax:* +86-551-6559-1589.

*Fax:* +86-431-8526-2836.

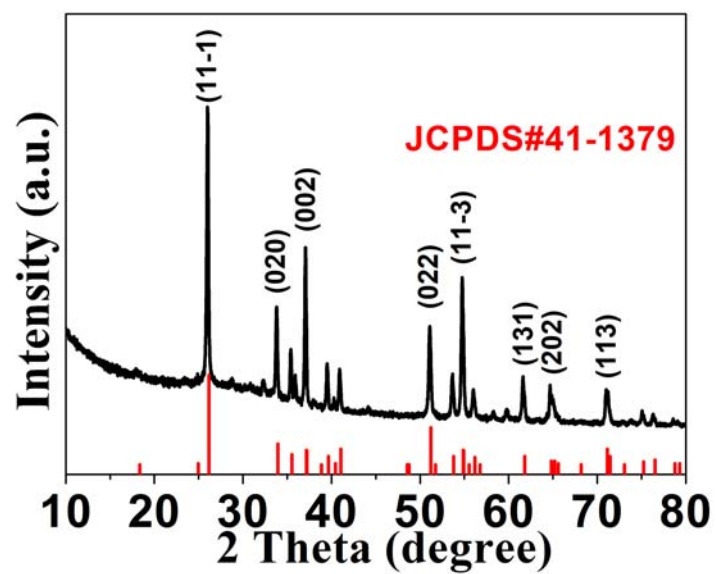

Figure S1. X-Ray Powder Diffraction (XRD) pattern of MnOOH.

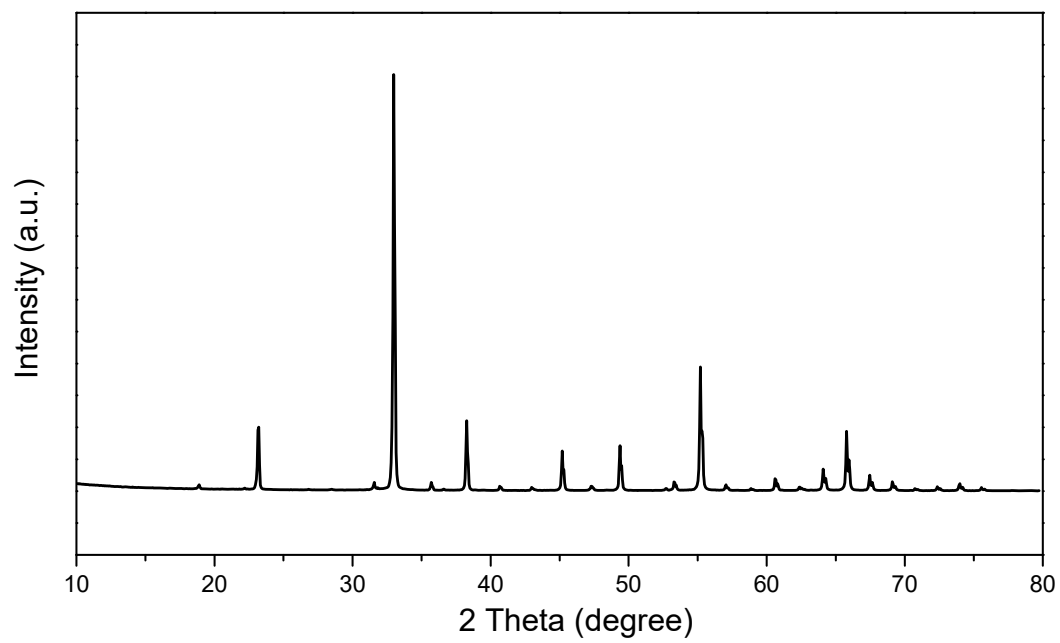

**Figure S2.** XRD pattern of the final product after the TGA tests.

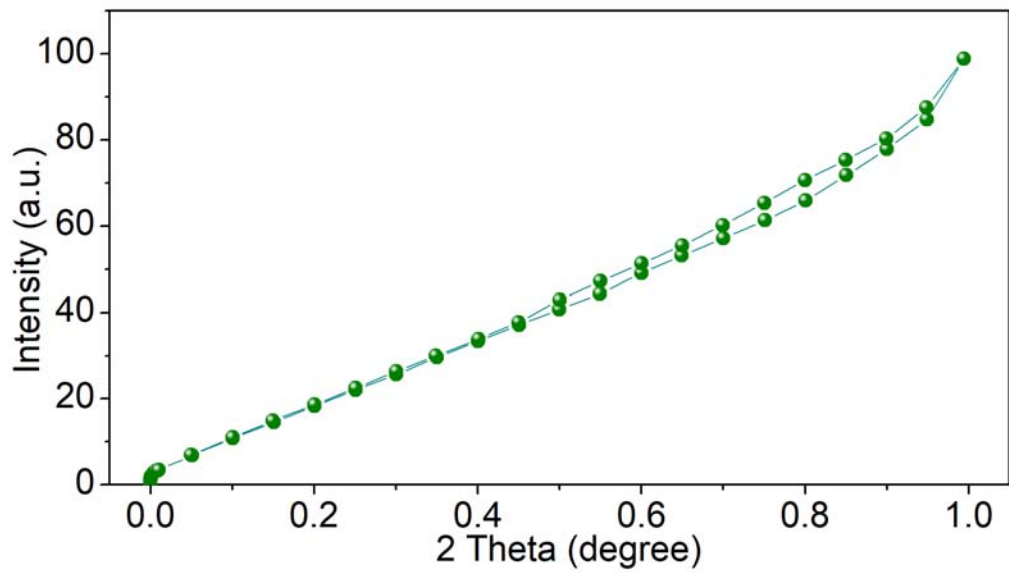

**Figure S3** N<sub>2</sub> adsorption-desorption profile of bare MnO.

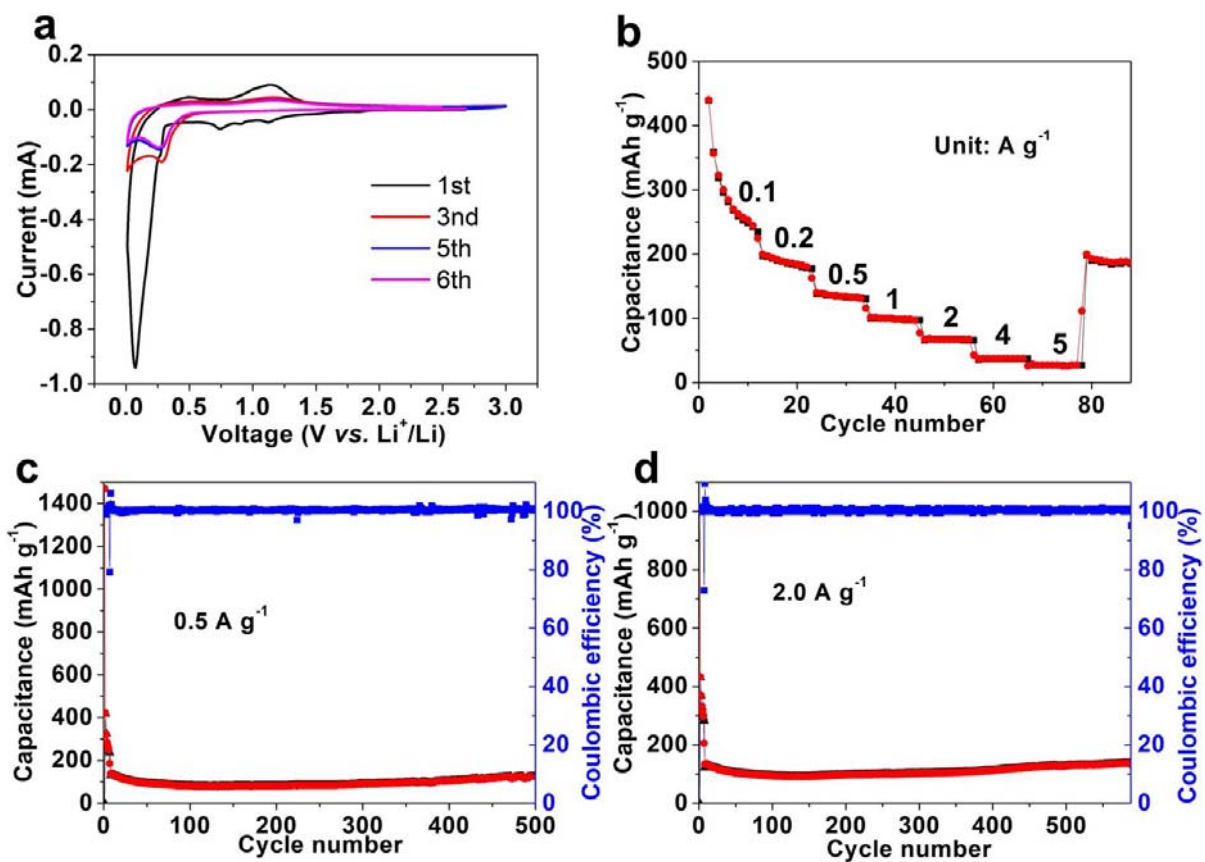

**Figure S4.** Electrochemical performance of MnOOH. (a) Cyclic voltammograms, (b) rate capability, and (c) cycling performance at (c) 0.5 and (d) 2.0 A g<sup>-1</sup>.

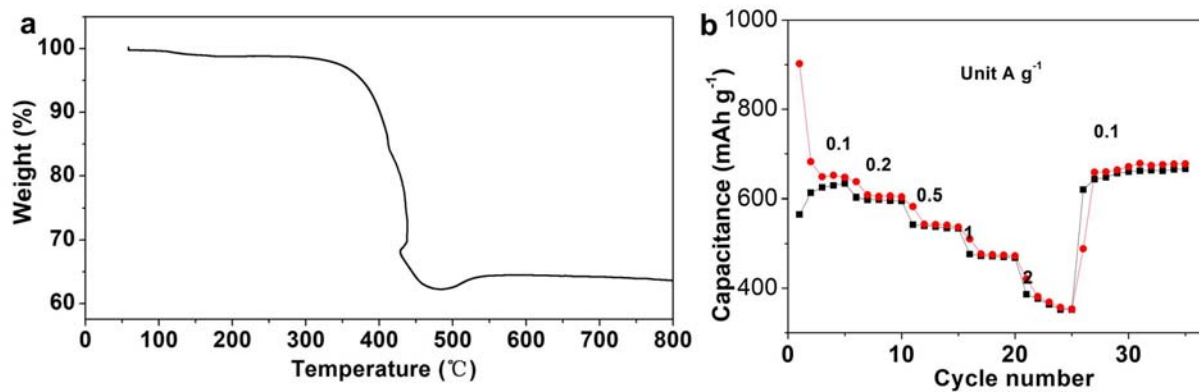

**Figure S5.** (a) TGA curve and (b) rate capacities of MnO@C annealed at 600 °C for 4 h.

The lithium ions and electron transport kinetics with the MnO@C and MnOOH are described by electrochemical impedance spectroscopy (EIS) measurements. Fig. S6 presents the Nyquist plots of MnOOH and MnO@C electrodes in the fresh cells, with the equivalent circuit model revealed in the inset. According to the fitting results in Table S1, for both the MnOOH and MnO@C electrodes, the charge-transfer resistance ( $R_{ct}$ ) of MnO@C (i.e. 71.6  $\Omega$ ) is much lower than that of bare MnOOH (156.2  $\Omega$ ), suggesting that the reactions of MnO@C are faster than bare MnO. Moreover, the internal resistance ( $R_s$ ) and resistance of SEI film ( $R_{SEI}$ ) values of MnO@C are smaller than that of MnOOH, meaning that MnO@C is beneficial for the enhanced electron transport.

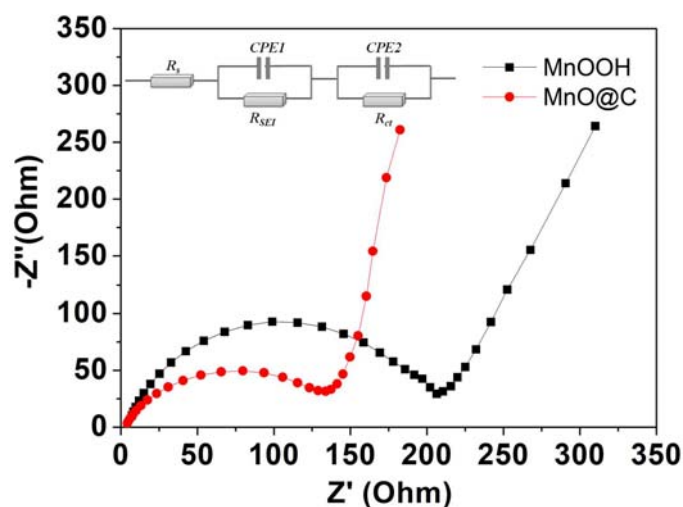

**Figure S6.** Nyquist plots of MnO@C and MnOOH electrode. Inset is the model of the equivalent circuit.

**Table S1** Impedance parameters,  $R_s$ ,  $R_{SEI}$  and  $R_{ct}$ , obtained from the EIS plots of MnOOH and MnO@C.

| LIB   | $R_s$ ( $\Omega$ ) | $R_{SEI}$ ( $\Omega$ ) | $R_{ct}$ ( $\Omega$ ) |
|-------|--------------------|------------------------|-----------------------|
| MnOOH | 4.304              | 13.05                  | 156.2                 |
| MnO@C | 2.016              | 5.23                   | 71.6                  |
